# Supplementary material for: Mycoplasma pneumoniae Large DNA Repetitive Elements RepMP1 Show Type Specific Organization among Strains
Source: PLoS One. 2012 Oct 16;7(10):e47625. doi: 10.1371/journal.pone.0047625 (PMC3472980; doi:10.1371/journal.pone.0047625)
Supplement: Table S1 — Primers used for PCR amplification of MPN142-RepMP5 repeat and RepMP1-genes. (DOCX) [file pone.0047625.s006.docx]

Table S1: Primers used for PCR amplification of MPN142-RepMP5 repeat and RepMP1-genes.

| | **Primer** | **Sequence** | **Position within M129 genome** | **PCR product (bp)** | | --- | --- | --- | --- | | RepMP5F | CCGCACAGGTATCAGTCAAG | 185606-185625 | 1979 (type 1) | | RepMP5R | TACCCCCCATCACTGTCCAA | 187565-187584 | 1778 (type 2) | | MPN037F | CCTAATCAATATAGGCACTGTTGG | 45691-45714 | 569 | | MPN037R | GCAGTTGATCCTCGTTGACA | 46240-46259 |  | | MPN094Fa | GCTGAACTTAGTTGGCAGCA | 116215-116234 | 526 | | MPN094R | AATTGCTGGTATTCTTTATTTTGAA | 116716-116740 |  | | MPN100F | GCTCAAGCTAAGCTCCCAAA | 129396-129415 | 714 | | MPN100R | CGGTGGATGGCTTTTTATTT | 130090-130109 |  | | MPN127F | TTTTTGGTTTATTTTTGGTGTCTTT | 164421-164445 | 837 (type 1) | | MPN127R | ATTTGGGCGGATCGACTTTGTCCAG | 165233-165257 | 879 (type 2) | | MPN129F | TGATGATGTTAGGATCATTAATTGCATTG | 167990-168018 | 2289 (type 1) | | MPN131R | GCTGATTAGGCGTAGTTCGCGAACCA | 170253-170278 | 1609 (type 2) | | MPN138F | GATTGAAACTGAGTTAAAGAGTCAGGG | 179355-179381 | 2586 (type 1) | | MPN137R | ATGAAAGCCGTGGGATCACG | 176838-176857 | 1626 (type 2) | | MPN139F | GGTGTACTTGGCTATTCATTGGTG | 179866-179889 | 1262 | | MPN139R | CCAGCTTATCAACCTTATTTTCAATC | 178628-178653 |  | | MPN151Fb | CGCACAATTTCACTTACTTTGTTTAAG | 199040-199066 | 595 | | MPN151R | CTTTTAAAACCAATTTTGGTCGT | 199612-199634 |  | | MPN204F | GCAAGTTTTGTTGACACCTTTA | 247490-247511 | 764 | | MPN204R | CAAAATCATTAAAAACTAT | 248225-248243 |  | | MPN283F | AATGGTATTGATCCCCGTTG | 336398-336417 | 483 | | MPN283R | AATTTTCTCGCCCTGCTTTT | 336861-336880 |  | | MPN287Fb | CGCACAATTTCACTTACTTTGTTTAAG | 343665-343691 | 556 | | MPN287R | CCTTGAGCAGATGGCTTTTT | 344201-344220 |  | | MPN368Fa | GCTGAACTTAGTTGGCAGCA | 439148-439167 | 715 | | MPN368R | TCCTTGATAGGATGGCTTTTT | 439842-439862 |  | | MPN410F | ATACGCCTTTGCGGTGTTAC | 494604-494623 | 597 | | MPN410R | AAAAATACCAACAGCTTGTTTTTAAG | 495175-495200 |  | | MPN465F | TTAGCCGTCCATCTTTCACC | 569254-569273 | 724 | | MPN465Ra | GCTGAACTTAGTTGGCAGCA | 568550-568569 |  | | MPN484F | CATCAAAAGCCTGAATCGAA | 588638-588657 | 423 | | MPN484R | GATAAATAAAAATACCAACAACTGACA | 588235-588261 |  | | MPN501F | CGTTGCTAATGCAAGCTCAA | 608091-608110 | 767 or 788 | | MPN501R | CCTTGGACAGATGGCTTTTT | 608838-608857 | not type-specific | | MPN504F | AATTTAGCAAAACAGCTGAAC | 612654-612674 |  | | MPN504R | AAGGCAAAGATGATGTTAGTCAAA | 613286-613309 | 656 | | MPN524Fa | GCTGAACTTAGTTGGCAGCA | 646107-646126 | 682 (type 1) | | MPN524R | CCTTGGGCAGATGGTTTTT | 645445-645463 | 661 (type 2) | | MPN655F | AGCTTGATCAGTGTGTTGCCTA | 779964-779985 |  | | MPN655R | TGCCAACAAAATTGCAAAAA | 780698-780717 | 754 | |
| --- | --- | --- | --- | --- | --- | --- | --- | --- | --- | --- | --- | --- | --- | --- | --- | --- | --- | --- | --- | --- | --- | --- | --- | --- | --- | --- | --- | --- | --- | --- | --- | --- | --- | --- | --- | --- | --- | --- | --- | --- | --- | --- | --- | --- | --- | --- | --- | --- | --- | --- | --- | --- | --- | --- | --- | --- | --- | --- | --- | --- | --- | --- | --- | --- | --- | --- | --- | --- | --- | --- | --- | --- | --- | --- | --- | --- | --- | --- | --- | --- | --- | --- | --- | --- | --- | --- | --- | --- | --- | --- | --- | --- | --- | --- | --- | --- | --- | --- | --- | --- | --- | --- | --- | --- | --- | --- | --- | --- | --- | --- | --- | --- | --- | --- | --- | --- | --- | --- | --- | --- | --- | --- | --- | --- | --- | --- | --- | --- | --- | --- | --- | --- | --- | --- | --- | --- | --- | --- | --- | --- | --- | --- | --- | --- | --- | --- | --- | --- | --- | --- | --- | --- | --- | --- | --- | --- | --- | --- | --- | --- | --- | --- | --- | --- |

a Same forward primer paired with gene-specific reverse primers was used to amplify MPN094, MPN368 and MPN524 regions. The same primer was used as reverse primer in amplification of MPN465.

b Identical forward primer combined with gene-specific reverse primers was used to amplify MPN151 and MPN287 regions.

For further analysis, individual products were extracted from 1.5% agarose (QIAquick®  Gel Extraction Kit, QIAGEN Sciences).
